# Supplementary material for: Lyophilization process optimization and molecular dynamics simulation of mRNA-LNPs for SARS-CoV-2 vaccine
Source: PubMed Central journal article supplement (PMC10562438; doi:10.1038/s41541-023-00732-9), 2023-10-09
Supplement: 41541_2023_732_MOESM1_ESM.pdf [file 41541_2023_732_MOESM1_ESM.pdf]

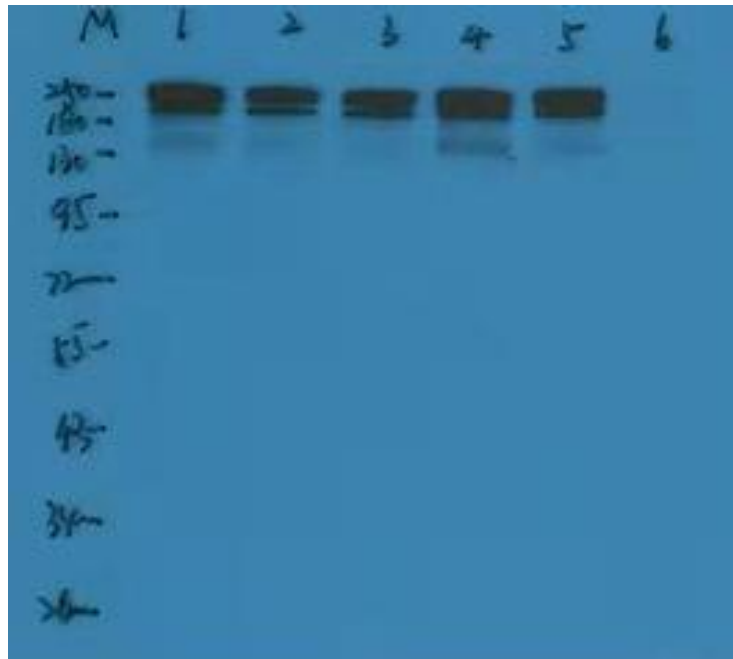

**Figure S1** The the original western blots image of Figure 6D. Expression of S-protein in mRNA-LNP-treated cells (1,2,3,5-Lyophilized LNP;4-non-Lyophilized LNP;6-negative control). All blots were processed in parallel and derive from the same experiments.
